1 Codon-optimized TDP-43-mediated neurodegeneration in a *Drosophila* model

2 for ALS/FTLD

3 Tanzeen Yusuff<sup>\* † \*\*</sup>, Shreyasi Chatterjee<sup>† ‡</sup>, Ya-Chu Chang<sup>†† ‡‡</sup>, Tzu-Kang Sang<sup>†† ‡‡</sup>, and George R.  
4 Jackson<sup>† ‡ § §§ \*\*\*</sup>

5

6 <sup>\*</sup>Department of Neuroscience and Cell Biology, <sup>†</sup>Mitchell Center for Neurodegenerative Diseases,

7 <sup>‡</sup>Department of Neurology, <sup>§</sup>Department of Biochemistry and Molecular Biology, University of Texas  
8 Medical Branch at Galveston, Galveston, TX 77550, USA

9 <sup>\*\*</sup>Department of Biochemistry and Molecular Biology, Pennsylvania State University, University Park,  
10 PA 16802, USA

11 <sup>††</sup>Institute of Biotechnology, Department of Life Science, <sup>‡‡</sup>Brain Research Center, National Tsing Hua  
12 University, Hsinchu, Taiwan

13 <sup>§§</sup>Department of Neurology, Baylor College of Medicine, <sup>\*\*\*</sup>National Parkinson's Disease Research  
14 Education and Clinical Center, Michael E. DeBakey VA Medical Center, Houston, TX 77030, USA

15

16

17

18

19

20

21

22

23

24 **Drosophila model for codon-optimized TDP-43**

25

26 **Key words:** Drosophila, neurodegeneration, TDP-43, ALS, FTL D

27

28 **Corresponding Authors:**

29 Tanzeen Yusuff, PhD

30

31 Post-Doctoral Research Fellow

32 Pennsylvania State University

33 Dept of Biochemistry and Molecular Biology

34 205 Life Sciences Building

35 University Park, PA 16802

36 Email: [txy175@psu.edu](mailto:txy175@psu.edu)

37 Ph: 814-865-0674

38

39

40 George R. Jackson, MD, PhD

41

42 Professor, Department of Neurology

43 Baylor College of Medicine

44 Director, Cognitive Disorders Clinic

45 Associate Director for Research

46 National Parkinson's Disease Research Education and Clinical Center, Houston

47 Michael E. DeBakey VA Medical Center

48 2002 Holcombe Blvd

49 Houston TX 77030

50 Email: [George.Jackson6@va.gov](mailto:George.Jackson6@va.gov)

51 Ph: (713) 794-8936

52

53

54

55

56

57

58

59 **ABSTRACT**

60 Transactive response DNA binding protein-43 (TDP-43) is known to mediate neurodegeneration  
61 associated with amyotrophic lateral sclerosis (ALS) and frontotemporal lobar degeneration (FTLD). The  
62 exact mechanism by which TDP-43 exerts toxicity in the brains of affected patients remains unclear. In  
63 a novel *Drosophila melanogaster* model, we report gain-of-function phenotypes due to misexpression of  
64 insect codon-optimized version of human wild-type TDP-43 (CO-TDP-43) using both the binary  
65 GAL4/UAS system and direct promoter fusion constructs. The CO-TDP-43 model showed robust tissue  
66 specific phenotypes in the adult eye, wing, and bristles in the notum. Compared to non-codon optimized  
67 transgenic flies, the CO-TDP-43 flies produced increased amount of high molecular weight protein,  
68 exhibited pathogenic phenotypes, and showed cytoplasmic aggregation with both nuclear and  
69 cytoplasmic expression of TDP-43. Further characterization of the adult retina showed a disruption in  
70 the morphology and function of the photoreceptor neurons with the presence of acidic vacuoles that are  
71 characteristic of autophagy. Based on our observations, we propose that TDP-43 has the propensity to  
72 form toxic protein aggregates via a gain-of-function mechanism, and such toxic overload leads to  
73 activation of protein degradation pathways such as autophagy. The novel codon optimized TDP-43  
74 model is an excellent resource that could be used in genetic screens to identify and better understand the  
75 exact disease mechanism of TDP-43 proteinopathies and find potential therapeutic targets.

76

77

78

79

80

## 81 INTRODUCTION

82 Transactive response DNA binding protein-43 (TDP-43), encoded by *TARDBP* gene in the human  
83 genome, has been identified as a major component for the pathology of motor neuron diseases and  
84 related neurodegenerative diseases (Neumann *et al.* 2006; Hasegawa *et al.* 2007). TDP-43 is a highly  
85 conserved and ubiquitously expressed protein that is primarily involved in regulation of RNA levels,  
86 RNA trafficking, and alternative splicing. The presence of tau-negative TDP-43 and ubiquitin-positive  
87 inclusion bodies is a major disease hallmark of amyotrophic lateral sclerosis (ALS) and frontotemporal  
88 lobar dementia (FTLD) (Neumann *et al.* 2006; Arai *et al.* 2006; Mackenzie and Rademakers 2008; Lee  
89 *et al.* 2012). In the diseased state, TDP-43 is found to be ubiquitinated and phosphorylated, and exhibits  
90 truncated C-terminal fragments and insoluble inclusions. The distinctive pathology of TDP-43 mediated  
91 neurodegeneration also involves its mislocalization to the cytoplasm and the loss of normal nuclear  
92 expression (Arai *et al.* 2009; Barmada *et al.* 2010; Guo *et al.* 2011; Lee *et al.* 2012; Nguyen *et al.* 2018).  
93 Mutations in the *TARDBP* gene are associated with both familial and sporadic cases of these diseases.  
94 Most of the dominant missense mutations are present in the glycine-rich domain near the C-terminal of  
95 TDP-43 (Nonaka *et al.* 2009; Lee *et al.* 2012), and have been linked to the formation of toxic TDP-43  
96 aggregates that mediate neurodegeneration (Igaz *et al.* 2011). Protein-protein interactions,  
97 hyperphosphorylation, ubiquitination, and cleavage of the prion-like C-terminal fragment have been  
98 implicated in the formation of these TDP-43 aggregates (Johnson *et al.* 2009). In addition, the increased  
99 load of toxic protein aggregates has been suggested to cause defects in protein degradation systems,  
100 including autophagy and the ubiquitin proteasome system (UPS) (Rubinsztein 2006; Blokhuis *et al.*  
101 2013). In order to better understand the pathogenic mechanisms of TDP-43 mediated neurodegeneration,  
102 many cellular and animal models have been generated in both vertebrates and invertebrates, which  
103 include gain-of-function, RNA interference (RNAi) mediated suppression, and loss-of-function models

104 (Johnson *et al.* 2008; Feiguin *et al.* 2009; Lu *et al.* 2009; Wegorzewska *et al.* 2009; Li *et al.* 2010;  
105 Stallings *et al.* 2010; Tsai *et al.* 2010; Estes *et al.* 2011; Gendron and Petrucelli 2011; Vaccaro *et al.*  
106 2012; Romano *et al.* 2012; Choksi *et al.* 2014).

107 *Drosophila melanogaster* has been widely utilized to study neurodegenerative diseases in an *in*  
108 *vivo* model system (Sang and Jackson 2005). We and others have previously shown that overexpressing  
109 toxic proteins such as full-length human tau, alpha-synuclein, or huntingtin in the *Drosophila* eye or  
110 neuromuscular junction results in degenerative phenotypes that are ideal for high-throughput screens, as  
111 well as for studying pathogenic mechanisms of the disease (Feany and Bender 2000; Auluck *et al.* 2002;  
112 Shulman and Feany 2003; Blard *et al.* 2007; Chatterjee *et al.* 2009; Wegorzewska *et al.* 2009; Li *et al.*  
113 2010; Shulman *et al.* 2014). For example, loss-of-function models generated using deletion, nonsense or  
114 null mutations, and RNA-interference mediated knockdown of the *Drosophila* homolog of TDP-43,  
115 TBPH, showed shortened lifespan, locomotor and neuromuscular junction (NMJ) defects, and decreased  
116 dendritic branching of DA neurons (Feiguin *et al.* 2009; Lu *et al.* 2009). Furthermore, gain-of-function  
117 transgenic fly models overexpressing disease-specific variants of human TDP-43 (hTDP-43) showed  
118 decreased longevity, decreased locomotor activity, and increased morphological defects of motor  
119 neurons, along with axonal damage and, in some cases, neuronal loss (Lu *et al.* 2009; Li *et al.* 2010,  
120 2011; Hanson *et al.* 2010; Ritson *et al.* 2010; Voigt *et al.* 2010; Estes *et al.* 2011; Guo *et al.* 2011;  
121 Miguel *et al.* 2011; Langellotti *et al.* 2016; Chang and Morton 2017; Pons *et al.* 2017). These gain-of-  
122 function mutations only account for about 10% of familial cases of ALS/FTLD, while 90% of affected  
123 individuals are sporadic cases involving wild-type TDP-43 mediated neurodegeneration (Nguyen *et al.*  
124 2018). However, current studies involving wild-type TDP-43 have reported only subtle phenotypes that  
125 were difficult to quantify or did not exhibit robust disease-associated pathology. Therefore, there is a

126 need for a robust model of wild-type TDP-43 mediated pathology to understand the cellular mechanisms  
127 associated with ALS/FTLD.

128 We generated an overexpression model of the human wild-type TDP-43 transgene by codon-  
129 optimization to accommodate insect transcriptional and translational machinery. It has been shown, even  
130 in *Drosophila melanogaster*, that certain 3-base pair sequences or codons in the mRNA transcript are  
131 more optimal in translating into the same amino acid over others (Powell and Moriyama 1997; Welch *et*  
132 *al.* 2009). Using this phenomenon, we manipulated the human *TARDBP* gene by altering the coding  
133 region so that codons were optimized in a *Drosophila melanogaster* cellular environment to maximize  
134 TDP-43 expression, henceforth referred to as CO-TDP-43. In contrast to previous fly models, we  
135 demonstrate that the CO-TDP-43 lines lead to increased TDP-43 expression and form toxic cytoplasmic  
136 aggregates that gives rise to strong phenotypes when expressed in the fly retina, wing, and notum.  
137 Further characterization of the retinal phenotype revealed a disruption in the internal morphology and  
138 function of the photoreceptor neurons, as well as presence of acidic autophagic-lysosomal vacuoles that  
139 are positive for key autophagy proteins. Our CO-TDP-43 model recapitulates phenotypes of ALS/FTLD  
140 disease pathology and is an ideal resource for investigating the mechanisms of pathogenesis for these  
141 diseases.

142

143

144

145

146

147

148

149

150 **MATERIALS AND METHODS**

151 *Fly stocks and genetics*

152 Codon optimized TDP-43 gene was synthesized from DNA2.0 (ATUM, Newark, CA, USA). The  
153 complete sequence of the codon optimized TDP-43 is provided in the **Supplemental Fig. S2**.  
154 *Drosophila* kozak sequence (ATCAAC) was added upstream of the start codon for the TDP43 gene.  
155 These constructs were subcloned into the Not1-Xba1 site of the modified fly upstream activation  
156 sequence (UAS) expression (pEx-UAS) and glass (pEx-gl) vectors (Exelixis, San Francisco, CA, USA).  
157 The expression vectors containing the codon optimized TDP-43 gene were then microinjected into the  
158 flies to obtain transgenic flies (BestGene, Chino Hills, CA, USA). The expression of non-CO-TDP-43 is  
159 driven in the fly eye by the *glass* multimer reporter, GMR-GAL4 on the X-chromosome (Freeman  
160 1996). All transgenic lines, both codon optimized and non-codon optimized, express human wild-type  
161 TDP-43. Flies expressing human codon wild-type TDP-43 using the UAS promoter were obtained from  
162 Dr. Fen-Biao Gao (University of Massachusetts, Worcester, MA, USA) (Lu *et al.* 2009). SevEP-GAL4  
163 driver (expressed in R7 and R8 photoreceptor neurons) was recombined with UAS-TDP-43CO to obtain  
164 stable transgenic flies expressing w<sup>1118</sup>;SevEP-GAL4,UAS-TDP-43CO/CyO;+. The GMR-GAL4 on  
165 the X-chromosome was placed in trans to the gl-TDP-43CO line to generate GMR-GAL4;gl-TDP-  
166 43CO/CyO transgenic flies. The following stocks were obtained from Bloomington *Drosophila* Stock  
167 Center (Bloomington, Indiana University, IN, USA): w<sup>1118</sup>;UAS-LacZ, w<sup>1118</sup>,GMR-myr-mRFP,  
168 y<sup>1</sup>,w<sup>1118</sup>;Sp/CyO;eGFP-ATG5, y<sup>1</sup>,w<sup>1118</sup>;UASp-GFP-mCherry-ATG8, GMR-GAL4(X) (eye  
169 specific), w<sup>1118</sup>;SevEP-GAL4 (R7 and R8 in photoreceptor cells), y<sup>1</sup>,w<sup>1118</sup>;Rh1-GAL4/CyO  
170 (expressed in R1-R6 photoreceptor cells), w<sup>1118</sup>,*beadex*<sup>MS1096</sup>-GAL4 (wing driver), w<sup>1118</sup>;Scabrous-  
171 GAL4 (sensory organ precursor and wing discs driver), and y<sup>1</sup>,w<sup>\*</sup>; CCAP-GAL4 (driver expressed in  
172 CCAP/bursicon neurons in ventral nerve cord and subesophageal ganglion in adult brain). *Eq*-GAL4

173 (bristle driver) was obtained from Dr. Hugo J. Bellen (Baylor College of Medicine, Houston, TX). All  
174 crosses were set and flies were maintained at room temperature (22°C) in standard *D. melanogaster*  
175 Jazzmix medium (Applied Scientific, Fisher Scientific, Pittsburgh, PA, USA).

### 176 ***Immunohistochemistry***

177 Adult retina and imaginal eye discs from third instar larvae were dissected and fixed in 4%  
178 paraformaldehyde for 1 hour on ice. Adult retina was washed in 0.5% PTX for 3 hours to reduce  
179 autofluorescence. The tissues were blocked in 0.8% PBS+Triton-X+BSA for 2 hours and incubated with  
180 primary antibody overnight at 4°C. The tissues were incubated in secondary antibody for 2 hours at  
181 room temperature, washed in 0.1% PBS+Triton-X and mounted on glass slides with Vectashield (Vector  
182 Laboratories, Burlingame, CA, USA). Tissues were stained with the following antibodies: mouse  
183 monoclonal anti-TDP-43 antibody (1:500, Abcam, Cambridge, MA, USA), rabbit polyclonal anti-TDP-  
184 43 antibody (1:500, Proteintech, Chicago, IL, USA), rat monoclonal anti-Elav (1:20, DSHB, University  
185 of Iowa, Iowa City, IA, USA), mouse monoclonal anti-GFP (1:400, Millipore, Billerica, MA, USA),  
186 Alexa Fluor 633-conjugated Phalloidin (1:30, Invitrogen, Grand Island, NY, USA), Alexa Fluor 488  
187 conjugated chicken anti-rat (1:400, Invitrogen, Grand Island, NY, USA) Alexa Fluor 568 conjugated  
188 goat anti-rabbit (1:400, Invitrogen, Grand Island, NY, USA) and Alexa Fluor 568 conjugated goat anti-  
189 mouse (1:400, Invitrogen, Grand Island, NY, USA).

### 190 ***Immunoblotting***

191 Overexpression of CO-TDP-43 in the fly eye was used to measure total protein levels by  
192 immunoblotting. Approximately 50 fly heads were decapitated and homogenized for 1 min in  
193 homogenization buffer (10mM Tris-HCl, 0.8 M NaCl, 1 mM EGTA, pH 8.0 and 10% sucrose) along  
194 with 1X PhosSTOP phosphatase and 1X cComplete protease buffer (Roche Applied Science,  
195 Indianapolis, IN, USA). The homogenized samples were centrifuged at 4°C for 15 min at 18,000g. The



196 supernatant was collected and equal parts of the supernatant and Laemmle sample loading buffer with  $\beta$ -  
197 mercaptoethanol (Bio-Rad, Hercules, CA, USA) was added for each sample. Following a brief pulse  
198 centrifugation, samples were loaded on 4-20% SDS-PAGE gels (Bio-Rad, Hercules, CA, USA) for  
199 electrophoresis. For higher molecular weight species detection, the fly heads were homogenized in 1X  
200 PBS along with the same protease and phosphatase inhibitors. Non-reducing sample loading buffer  
201 (Nupage sample buffer, Life Sciences, Grand Island, NY, USA) was added to the supernatant without  $\beta$ -  
202 mercaptoethanol. The blots were blocked in 5% milk, incubated with primary antibodies overnight at  
203 4°C, washed in 1X TBS+Tween, and incubated with secondary antibody for 1 hour at room temperature.  
204 The following antibodies were used: mouse monoclonal anti-TDP-43 antibody (1:1000, Abcam,  
205 Cambridge, MA, USA), mouse monoclonal anti-tubulin antibody (1:1000, DSHB, University of Iowa,  
206 Iowa City, IA, USA) and secondary anti-mouse IgG-HRP (1:2000, GE Healthcare).

### 207 *Lysotracker Staining*

208 For LysoTracker staining, imaginal eye discs from the third instar larvae were dissected in 1X PBS  
209 solution without fixative. The eye discs were then stained with 100 nM LysoTracker Red DND-99  
210 (Invitrogen) for 2 minutes, followed by a 1 minute wash in 1X PBS. The tissues were mounted on a glass  
211 slide with a drop of 1X PBS solution; no Vectashield was added. The coverslip was sealed with nail  
212 polish and visualized immediately using a confocal microscope. The z-stack images were analyzed using  
213 the ImageJ software (Schneider *et al.* 2012).

### 214 *Electroretinogram*

215 ERG was recorded in 1 day old flies using the same methods as previously described (Fabian-Fine *et al.*  
216 2003; Williamson *et al.* 2010). Briefly, flies were glued on glass slides using Elmer's non-toxic glue.  
217 Both the reference and recording electrodes were made of glass pipettes filled with 3M KCl. The light  
218 stimulus was computer-controlled using white light-emitting diode system (MC1500; Schott), and was

219 provided in 1-s pulses. The data was recorded using Clampex software (version 10.1; Axon Instruments)  
220 and measured and analyzed using Clampfit software (version 10.2; Axon Instruments).

### 221 ***Microscopy***

222 The adult eye, wing and bristle pictures were taken with a Nikon AZ100M microscope equipped with a  
223 Nikon DS-Fi1 digital camera (Nikon Instruments, Melville, NY, USA). Extended depth of focus (EDF)  
224 and volumetric images were taken using the Nikon NIS-Elements AR 3.0 software as previously  
225 described (Ambegaokar and Jackson 2011). The scanning electron microscope (SEM) images were  
226 taken using JSM-6510LV SEM (JEOL USA, Peabody, MA, USA). The confocal images were taken  
227 with a Zeiss LSM 510 UV META laser scanning confocal microscope using 40X water and 63X oil-  
228 immersion high-resolution objectives. These images were analyzed using the LSM Image Browser and  
229 NIH ImageJ software (Schneider *et al.* 2012).

### 230 ***Statistical Analysis***

231 Quantification of LysoTracker staining was performed using the NIH Image J software (Schneider *et al.*  
232 2012). The measurements and histograms represent mean $\pm$ SEM and plotted using Microsoft Excel and  
233 SigmaPlot (version 10.1) software. Statistical analysis was performed using one-way ANOVA with  
234 Bonferroni's correction and paired Student's t-test with two-tailed distributions of equal variance.

### 235 ***Data Availability***

236 The codon-optimized TDP-43 fly lines are available upon request.

237

238

239

240

241

242

243

244 **RESULTS**

245 **Codon-optimized wild-type TDP-43 flies exhibit an age-dependent robust eye phenotype**

246 We generated multiple codon-optimized CO-TDP-43 transgenic fly lines to investigate TDP-43  
247 mediated neurodegeneration. We utilized both the yeast GAL4/UAS binary system (Brand and Perrimon  
248 1993) and a *glass (gl)* promoter direct fusion construct specifically generated to study TDP-43 mediated  
249 effects on the fly retina (**Fig. 1A-B**). In addition, we also used another eye promoter, *Sevenless (SevEP-*  
250 *GAL4)*, that only expresses in a subset of photoreceptor neurons (R7 and R8) and cone cells (Therrien *et*  
251 *al.* 1999). To highlight the robust effect observed in our CO-TDP-43 lines, we compared the phenotypes  
252 to a previously reported human TDP-43 transgenic line, which we denote as non-CO-TDP-43 (Lu *et al.*  
253 2009; Choksi *et al.* 2014).

254 Heterozygous expression of CO-TDP-43 using the *gl* promoter caused depigmentation,  
255 roughness, disruption of polarity, and loss of inter-ommatidial bristles (**Fig. 1F and J**). The CO-TDP-43  
256 expressed using *SevEP-GAL4* showed a similar but milder phenotype of the eye (**Fig. 1E and I**). In  
257 comparison to the CO-TDP-43 flies, the non-CO-TDP-43 transgenic flies (**Fig. 1D and H**) did not show  
258 a robust eye phenotype and appeared to be similar in morphology to the wild-type control flies (**Fig. 1C**  
259 **and G**). Interestingly, the eye phenotype observed with heterozygous *gl-CO-TDP-43* flies were age  
260 dependent. At day-1 post-eclosion, CO-TDP-43 exhibited a mild phenotype (**Fig. 1L**) that worsened by  
261 day 10 (**Fig. 1M**). In contrast, flies with two copies of the CO-TDP-43 transgene showed a strong  
262 phenotype at day-1 post-eclosion, with apparent necrotic patches or hyperpigmentation that worsened  
263 with age (**Fig. 1M**, white arrowheads). In addition, the CO-TDP-43 flies with either one or two copies of  
264 the TDP-43 transgene showed less eye volume than wild-type control flies at day-1 post-eclosion (**Fig.**  
265 **1O and P**). We also found that overexpression of CO-TDP-43 using GMR-GAL4 driver led to pupal  
266 lethality at 18°C and 25°C (**Supplemental Table S1**), with some escapers at 18°C that showed necrotic  
267 patches (**Supplemental Fig. S1**). Taken together, our results showed that CO-TDP-43 transgenic flies

268 have a more robust eye phenotype indicative of neurodegeneration in retinal cells compared to non-CO-  
269 TDP-43 transgenic flies.

270

271 **Misexpression of codon-optimized wild-type TDP-43 leads to necrosis and severe phenotypes in**  
272 **wings and notum**

273 TDP-43 associated pathology in ALS patients have been linked to significant neuronal loss and early  
274 axonal atrophy in sensory nerves (Hinds *et al.* 1991; Mochizuki *et al.* 2011). For example, Vaughan and  
275 colleagues reported that the pathogenic A315T mutation in TDP-43 affects neurite growth and decreased  
276 dendritic branching of sensory neurons (Vaughan *et al.* 2018). In fact, previously reported *Drosophila*  
277 neurodegeneration models showed that overexpression of the neurotoxic ataxin-1 mutant in sensory  
278 precursors using the *scabrous*-GAL4 (*sca*-GAL4) driver leads to loss of bristles in the adult fly (Tsuda  
279 *et al.* 2005). Similarly, we previously showed that misexpression of fly dVAP33, a gene linked to ALS,  
280 using *sca*-GAL4 leads to loss of notal macrochaetae (Ratnaparkhi *et al.* 2008). To further investigate the  
281 phenotypic effects of CO-TDP-43 on sensory precursor cells of the wing and notum, we used multiple  
282 wing and bristle drivers to misexpress TDP-43 protein, including *beadex*<sup>MS1096</sup>-GAL4 (*bx*<sup>MS1096</sup>-GAL4),  
283 *sca*-GAL4, *equate*-GAL4 (*eq*-GAL4), and CCAP-GAL4. We found that non-CO-TDP-43 transgene  
284 expressed using *bx*<sup>MS1096</sup>-GAL4 led to viable adults with shriveled wings, with some flies having wings  
285 that were either necrotic or had areas of hyperpigmentation (**Fig. 2B**). In contrast, CO-TDP-43 flies  
286 using the same driver exhibited a more severe phenotype, with pharate adults and very small and  
287 severely malformed wings with necrotic or hypermelanized patches (**Fig. 2C**). Interestingly, unlike the  
288 previously reported model of ALS, neither non-CO-TDP-43 nor CO-TDP-43 had any effect on  
289 macrochaetae (bristles) on the notum when misexpressed using *sca*-GAL4 driver. Instead, the CO-TDP-  
290 43 transgenic flies produced pharate adults with necrotic wings that were unable to expand (**Fig. 2F**).

291 Since we failed to see an effect of TDP-43 on macrochaetae using *sca*-GAL4, we used another bristle-  
292 specific driver, *eq*-GAL4, to misexpress non-CO and CO-TDP-43 in the fly notum (Tang and Sun  
293 2002). While both control and non-CO-TDP-43 flies showed normal macrochaetae formation (**Fig. 2J**  
294 **and K**), CO-TDP-43 showed a dramatic loss or defective notal macrochaetae (**Fig. 2L**). Furthermore,  
295 Vanden Broeck and colleagues previously showed that both up and downregulation of fly dTDP-43  
296 cause selective apoptosis in the crustacean cardioactive peptide (CCAP)/bursicon neurons (Vanden  
297 Broeck *et al.* 2013). Loss of CCAP/bursicon neurons have been shown to cause pupal lethality with  
298 escapers that show wing expansion defect phenotypes (Park *et al.* 2003). Upon expression of non-CO-  
299 TDP-43 in the CCAP/bursicon neurons using CCAP-GAL4, we observed a similar wing expansion  
300 defect in adults (**Fig. 2H**). Misexpression of CO-TDP-43 in CCAP/bursicon neurons resulted in smaller,  
301 necrotic and swollen wings compared to control flies (**Fig. 2I**). In summary, these results suggest that  
302 misexpression of CO-TDP-43 in flies leads to smaller wings with abnormal morphology and  
303 macrochaetae irregularities compared to misexpression of non-CO-TDP-43.

304

### 305 **Increased expression of codon-optimized TDP-43 exhibits disease-specific cytoplasmic** 306 **mislocalization and aggregation**

307 The robustness of the external phenotypes observed with CO-TDP-43 prompted us to examine the  
308 protein expression levels of the TDP-43 transgene in these flies. We next used multiple *gl* direct fusion  
309 CO-TDP-43 lines as well as the recombined *SevEP*-GAL4 line to examine TDP-43 expression levels in  
310 the fly eye. Compared to the GMR-GAL4 driven non-CO-TDP-43 transgenic flies, the CO-TDP-43 flies  
311 showed a 2-fold increase in monomeric total TDP-43 protein in multiple lines (**Fig. 3A**, lane 5, 6, 7 and  
312 8). The line showing the highest increase in protein levels, one of the *gl* direct fusion CO-TDP-43 lines  
313 (**Fig. 3A**, lane 5), also demonstrated a robust eye phenotype (**Fig. 1**) and was therefore used in

314 subsequent experiments. Predictably, compared to the *gl*-CO-TDP43 line, the recombinant line using  
315 *SevEP*-GAL4 to overexpress CO-TDP-43 did not show an increase in total TDP-43 expression, since it  
316 is only expressed in a subset of photoreceptor neurons (**Fig. 3A**, lane 8).

317         Similar to patients with ALS and FTLN, high-molecular weight toxic species of TDP-43 have  
318 been detected in transgenic flies overexpressing TDP-43 containing pathogenic variants (Miguel *et al.*  
319 2011; Chang and Morton 2017). For example, we previously reported high-molecular weight species of  
320 TDP-43 in flies overexpressing disease-associated TDP-43 Q331K mutations (Choksi *et al.* 2014). To  
321 investigate if we are able to detect these high-molecular weight oligomeric species in our codon  
322 optimized lines, we used the *gl* direct fusion line and the stable recombinant *SevEP*-GAL4 driven CO-  
323 TDP-43 lines. As expected, we detected higher molecular weight species in SDS-PAGE under non-  
324 denaturing conditions in both lines tested, with increased levels in the *gl* driven CO-TDP-43 line that  
325 were absent in the non-CO-TDP-43 flies. We also observed 15 kD and 35 kD truncated fragments in the  
326 codon optimized flies (**Fig. 3B**). These bands represent the previously reported caspase cleaved C-  
327 terminal fragment that is considered to be the toxic component of TDP-43 aggregates (Liu *et al.* 2014;  
328 Chiang *et al.* 2016).

329         The distinctive pathology of TDP-43 mediated neurodegeneration involves its mislocalization to  
330 the cytoplasm and loss of normal nuclear expression (Neumann *et al.* 2006; Lee *et al.* 2012). Therefore,  
331 we further investigated the localization of CO-TDP-43 in neuronal cells. When co-stained with *Elav* and  
332 TDP-43, the eye discs showed higher nuclear and cytoplasmic expression of TDP-43 in both CO-TDP-  
333 43 lines (*gl* and *SevEP*-GAL4 driven) compared to non-CO-TDP-43 flies. In particular, the *gl* driven  
334 CO-TDP-43 flies showed a more robust mislocalization of TDP-43 in the cytoplasm along with  
335 cytoplasmic aggregates (**Fig. 3G, 3I-L**). Overall, these observations indicate that a higher level of TDP-

336 43 protein has the propensity to form protein aggregates via a gain-of-function mechanism, similar to  
337 other neurodegenerative proteins such as tau, a $\beta$ , and alpha-synuclein.

338

### 339 **Morphological and functional disruption of photoreceptor neurons induced by codon-optimized** 340 **TDP-43**

341 Based on severe retinal phenotypes observed with toxic aggregates of TDP-43 protein, we further  
342 investigated the internal cellular morphology of the photoreceptor neurons. We utilized another eye-  
343 specific driver, *Rhl*-GAL4, which is expressed in R1–R6 neurons starting in late pupal stage and  
344 persisting throughout adulthood (Chyb *et al.* 1999). Unlike the *GMR*-GAL4, *SevEP*-GAL4 or *gl* direct  
345 fusion lines, this driver allowed us to examine adult onset expression of TDP-43. In day-7 post-eclosion  
346 CO-TDP-43 flies, we observed a degenerative phenotype in the adult retina marked by the loss of  
347 rhabdomere structures and vacuolization compared to the control flies (**Fig. 4B**). Comparatively, using  
348 the *gl* direct fusion CO-TDP43 line, we observed the degenerative phenotype as early as day-1 in post-  
349 eclosion flies. The *gl*-CO-TDP-43 flies exhibited an altered morphology of the photoreceptor neurons,  
350 which appeared to be flattened and had a disruption in rhabdomere separation (**Fig. 4D**) when visualized  
351 in the tangential view of the adult retina. Examination of the longitudinal view of the adult retina  
352 showed a marked reduction in thickness and shorter photoreceptor length compared to controls (marked  
353 by white lines in **Fig. 4E and I**). In addition, we found that these photoreceptor neurons were  
354 accompanied by large vacuolar structures, and co-staining with *Elav* revealed that TDP-43 was localized  
355 both in the nucleus and in the cytoplasm (**Fig. 4I-L**).

356 To investigate the physiological functions of these photoreceptor neurons, we used  
357 electroretinogram (ERG) recordings to measure the functionality of active photoreceptor neurons by  
358 measuring their response to light stimulus (Dolph *et al.* 2011). In fact, *Drosophila* neurodegeneration

359 models overexpressing tau and alpha-synuclein exhibited degenerative pathology in the fly retina along  
360 with neuronal dysfunction, as detected by ERG recording (Chouhan *et al.* 2016). Using this technique,  
361 we investigated whether CO-TDP-43 misexpression affects neuronal functionality compared to wild-  
362 type and GMR-RFP controls (**Fig. 4M-O**). The *gl*-TDP-43<sup>CO3</sup> flies demonstrated a reduction in both the  
363 amplitude of ERG in “on transient” and evoked depolarization at day-1 post-eclosion (**Fig. 4P and Q**).  
364 These effects were not observed with either control. Taken together, these results strongly suggest that  
365 CO-TDP-43 misexpression causes structural and functional degenerative phenotypes in the adult retina.

366

### 367 **Codon-optimized wild-type TDP-43 misexpression disrupts cellular lysosomal and autophagic** 368 **processes**

369 An upregulation of autophagy has been implicated in many neurodegenerative diseases, including ALS  
370 (Wong and Cuervo 2010; Brady *et al.* 2011; Sasaki 2011). Therefore, the presence of large vacuolar  
371 structures in the adult retina of CO-TDP-43 flies (see **Fig. 4**) led us to investigate if these vacuoles could  
372 possibly be a representation of autophagic intermediates. We performed live imaging of larval eye discs  
373 using LysoTracker to detect lysosomes and other acidic organelles, such as autophagosomes, that  
374 typically increase in number and/or size during the later stages of autophagy. Upon CO-TDP-43  
375 misexpression, we detected significantly larger number of acidic punctae compared to control flies (**Fig.**  
376 **5C**, white arrows and **Fig. 5D**), suggesting increases in autophagosomes due to elevated levels of TDP-  
377 43.

378 To further characterize the large vacuoles, we coexpressed CO-TDP-43 and a tagged autophagy  
379 protein, Atg5-GFP, which is responsible for the formation of the autophagosomes. We found that these  
380 vacuoles were positive for both Atg5 and TDP-43 (**Fig. 5E-H**). During autophagy, autophagosomes  
381 merge with lysosomes to become autolysosomes and are acidified to degrade proteinaceous waste



382 materials (Zhang *et al.* 2013). To determine if the autophagosomes observed were mature and functional  
383 autolysosomes, we used the Atg8-mCherry-GFP tandem reporter to assay the relative acidity of the  
384 autophagosome/autolysosomes. Atg8-mCherry-GFP is a tandem reporter that detects Atg8, which is  
385 localized in autophagic intermediates, and a pH-sensitive GFP that only emits a signal at a neutral pH  
386 (Filimonenko *et al.* 2007). This is a useful tool to help understand whether the large vacuoles observed  
387 in our CO-TDP-43 flies were autophagic as well as acidic, which is characteristic of autophagic  
388 intermediates. We coexpressed CO-TDP-43 with the tandem reporter and found that the larger punctae  
389 were positive for Atg8-mCherry, while only a subset of the relatively smaller punctae were stained with  
390 GFP, indicating non-acidic compartments (**Fig. 5I-K**). In contrast, the majority of the punctae that were  
391 larger in size were only fluorescent for Atg8-mCherry (**Fig. 5I-K**), indicating more acidic and mature  
392 autolysosomes. These results suggest that misexpression of CO-TDP-43 leads to increased acidic  
393 lysosomal vacuoles that are indicative of autophagy upregulation.

394

395

396

397

398

399

400

401

402

403

404

405

406 **DISCUSSION**

407 To date, very little is known about the exact mechanism of action of TDP-43 mediated toxicity. Here,  
408 we report a novel transgenic *Drosophila melanogaster* resource to better understand TDP-43 mediated  
409 neurodegeneration. There is great potential for the codon optimized TDP-43 model, as it exhibits robust  
410 and sensitive phenotypes ideal for genetic manipulations that allow us to understand its pathogenic  
411 mechanisms in an *in vivo* system. Our results suggest that this model has important utility in  
412 understanding the TDP-43 mediated pathology in neurodegenerative disorders.

413         Firstly, while previous studies using fly models helped us understand how the protein leads to  
414 toxicity and eventual neurodegeneration, there are several limitations associated with them. The reported  
415 models using fly lines overexpressing wild-type TDP-43 did not show strong phenotypes, and  
416 conclusions drawn from the fly studies depend heavily upon lines containing pathogenic variants (Lu *et*  
417 *al.* 2009; Li *et al.* 2010; Ritson *et al.* 2010; Voigt *et al.* 2010; Miguel *et al.* 2011; Langellotti *et al.* 2016;  
418 Chang and Morton 2017). Similar to published reports, we were previously unable to show any robust  
419 phenotypes with the wild-type human transgenic TDP-43 flies (Choksi *et al.* 2014). As a majority of  
420 ALS and FTLN cases do not carry known pathogenic mutations, it is critical to understand the  
421 mechanism by which the wild-type TDP-43 drives the disease. Compared to previously reported wild-  
422 type TDP-43 models, codon-optimized TDP-43 flies exhibit robust eye, wing, and bristle phenotypes,  
423 mirroring disease-specific characteristics of TDP-43 (summarized in **Table 1**). Our findings are in line  
424 with previous studies that associated pathogenic mutations in TDP-43 to severely damaged sensory  
425 neurons, affecting both the central and peripheral nervous systems in patients (Camdessanche *et al.*  
426 2011). The robust phenotypes observed in our study are indicative of cellular dysfunction and death, and  
427 are probable markers for neurodegenerative models. Using genetic and molecular approaches to analyze  
428 the mechanisms underlying TDP-43 mediated phenotypes in the eye or the wing may elucidate plausible  
429 therapeutic targets of TDP-43.

430           Secondly, our codon optimized TDP-43 transgenic model affected multiple different cell types in  
431 the fly retina, as evident by depigmentation of pigment cells, irregularities in interommatidial bristle  
432 cells, disruption in rhabdomeres morphology, disruption of photoreceptor neuron morphology, and  
433 necrosis of the cone cells. The effects of neurodegenerative proteins on the *Drosophila* eye can be  
434 diverse. For example, in a polyglutamine-expanded human huntingtin transgenic model, the expanded  
435 huntingtin protein was shown to form nuclear inclusions and cause severe degeneration of photoreceptor  
436 cells (Jackson *et al.* 1998). Furthermore, the human wild-type tau transgenic model showed abnormal  
437 polarity and some rhabdomere loss, mostly affecting the cone cells and ommatidial architecture (Jackson  
438 *et al.* 2002; Ambegaokar and Jackson 2011). Based on our observations, TDP-43 pathology is not  
439 restricted to photoreceptor neurons, but is most likely widespread among different cell types in the  
440 *Drosophila* retina. In fact, TDP-43 is known to be present and show disease-related pathology across  
441 different types of cells both in humans and in animal models (Mackenzie and Rademakers 2008;  
442 Wegorzewska *et al.* 2009). Moreover, a *Drosophila* model of TDP-43 has been shown to exhibit  
443 individual responses in motor neurons and glial cells (Estes *et al.* 2011). The codon-optimized TDP-43  
444 flies would therefore serve as an ideal genetic resource to pursue in-depth investigations that determine  
445 the morphological effects of TDP-43 in diverse cell types.

446           Thirdly, in our codon-optimized model, we detected mislocalization of the aggregated form of  
447 wild type TDP-43 from the nucleus to the cytoplasm. This phenomenon was validated by the  
448 electrophysiological readouts in our study, which showed that toxic aggregates of wild-type TDP-43  
449 reduced functional activity in photoreceptor neurons in the adult eye. The cytoplasmic mislocalization  
450 and presence of toxic TDP-43 aggregates have been well characterized in human patient samples of  
451 ALS/FTLD (Geser *et al.* 2009; Ritson *et al.* 2010; Miguel *et al.* 2011; Lee *et al.* 2012; Chang and  
452 Morton 2017). While *in vitro* studies have shown disease-specific mutant or truncated TDP-43 can form

453 toxic aggregates of oligomeric species, very few studies in wild-type TDP-43 animal models have  
454 demonstrated a similar robust production of TDP-43 aggregates (Johnson *et al.* 2009; Couthouis *et al.*  
455 2011; Guo *et al.* 2011; Lee *et al.* 2012; Choksi *et al.* 2014). Our study is unique in that it showed a  
456 similar accumulation of toxic aggregates with wild-type human TDP-43 protein. Our codon-optimized  
457 lines yield a higher level of TDP-43 protein expression compared to non-codon optimized lines and  
458 therefore display more robust toxic phenotypes. This is unsurprising, considering that there have been  
459 reports in both sporadic and familial cases of FTLD of increased TDP-43 expression in patient brain  
460 tissues (Mishra *et al.* 2007; Gitcho *et al.* 2009). Hence, there is a possibility that TDP-43 has a dosage-  
461 dependent effect on its propensity to form toxic aggregates. Several groups have further shown that  
462 cytoplasmic mislocalization of TDP-43 causes neuronal toxicity (Shan *et al.* 2009; Barmada *et al.* 2010).  
463 Previously, we have been able to show such robust mislocalization of TDP-43 only with disease-specific  
464 mutant hTDP-43 Q331K flies (Choksi *et al.* 2014). In keeping with these observations, the disease-  
465 specific, dysfunctional phenotypes that we observed with misexpression of wild-type TDP-43 in our  
466 codon optimized model offer a great resource to study the cellular processes that could be involved with  
467 ALS/FTLD.

468         Fourthly, in our codon-optimized TDP-43 model, we observed an increase in acidic vacuoles, as  
469 evident by lysotracker staining, that are positive for autophagic proteins ATG5 and ATG8 known to be  
470 involved in the formation of early and late stage autophagosomes (CITE). As misfolded proteins or toxic  
471 protein aggregates are typically cleared by autophagy, a disruption in the cellular process can lead to the  
472 accumulation of toxic protein aggregates, which has been linked to many neurodegenerative diseases,  
473 including Alzheimer's disease, Parkinson's disease, Huntington's disease, and ALS (Wong and Cuervo  
474 2010; Sasaki 2011). For example, accumulation of autophagosomes was observed in the spinal cord  
475 tissues of patients with sporadic ALS (Sasaki 2011). Previously, it has been reported that an inhibition of

476 the ubiquitin proteasome system and autophagy led to increased TDP-43 aggregation and toxicity  
477 (Brady *et al.* 2011). In addition, p62, which is a part of the ubiquitin proteasome system, has been  
478 identified to directly bind with TDP-43, and its overexpression can reduce TDP-43 aggregation (Tanji *et*  
479 *al.* 2012). Previously, we showed that misexpression of Tau leads to dysfunction of the autophagic  
480 process and leads to formation of giant autophagic bodies (Bakhoun *et al.* 2014). Similar to our  
481 previous findings, these acidic lysosomal vacuoles observed in codon-optimized TDP-43 model were  
482 mature autolysosomes induced to clear the cytoplasmic aggregates of TDP-43. Therefore, upregulation  
483 of autophagy in the clearance of TDP-43 proteinopathies could be manipulated as a potential therapeutic  
484 target, and our codon-optimized TDP-43 model is an excellent resource for further investigations into  
485 this mechanism.

486         Lastly, TDP-43 is an RNA-binding protein that is involved with RNA metabolism and  
487 regulation. As a result, much effort has been devoted to identify the RNA targets of TDP-43 using cell  
488 culture models, animal models, and ALS and FTLN patient brain samples. Recently, TDP-43 was shown  
489 to bind approximately 30% of the mouse transcriptome, identifying a vast number of possible interactors  
490 that can associate with TDP-43 to regulate RNA processing and splicing (Polymenidou *et al.* 2011;  
491 Tollervey *et al.* 2011). Many of these putative modifiers bind the UG-rich sequence at introns of TDP-  
492 43 (Bhardwaj *et al.* 2013). In this context, our codon-optimized human TDP-43 expressing fly model  
493 provides an *in vivo* platform to characterize and validate some of these modifiers to better understand the  
494 TDP-43-dependent disease mechanism in ALS/FTLD. In addition, the robust phenotypes observed in  
495 the external organs of the eye, wing, and notum of these flies can be scored easily, offering an excellent  
496 model for high-throughput screens of modifiers genes that will help elucidate the molecular mechanism  
497 of toxicity due to TDP-43. Targeted genetic screens that identify effectors of TDP-43 will allow us to  
498 further identify and pursue novel mechanisms for disease pathology.

499 **ACKNOWLEDGEMENTS**

500 We would like to thank Dr. Fen-Biao Gao for providing us with the human wild-type TDP-43 transgenic  
501 fly stock and Dr. Hugo J. Bellen for the *eq*-GAL4 stock. We would like to thank Dr. P. Robin Hiesinger  
502 for the GMR-RFP stock and for allowing us to use his laboratory and equipment to perform  
503 electroretinogram experiments, as well as Daniel Epstein for his help with the experiments. We would  
504 also like to thank Dr. Santhosh Girirajan, Dr. Suren Ambegaokar, Matthew Jensen, and Vijay Kumar for  
505 their helpful discussions and comments.

506

507

508

509

510

511

512

513

514

515

516

517

518

519

520

521

522

523

524 **REFERENCES**

- 525 Ambegaokar, S. S., and G. R. Jackson, 2011 Functional genomic screen and network analysis reveal  
526 novel modifiers of tauopathy dissociated from tau phosphorylation. *Hum. Mol. Genet.* 20: 4947–  
527 77.
- 528 Arai, T., M. Hasegawa, H. Akiyama, K. Ikeda, T. Nonaka *et al.*, 2006 TDP-43 is a component of  
529 ubiquitin-positive tau-negative inclusions in frontotemporal lobar degeneration and amyotrophic  
530 lateral sclerosis. *Biochem. Biophys. Res. Commun.* 351: 602–611.
- 531 Arai, T., I. R. Mackenzie, M. Hasegawa, T. Nonaka, K. Niizato *et al.*, 2009 Phosphorylated TDP-43 in  
532 Alzheimer’s disease and dementia with Lewy bodies. *Acta Neuropathol.* 117: 125–136.
- 533 Auluck, P. K., H. Y. E. Chan, J. Q. Trojanowski, V. M. Y. Lee, and N. M. Bonini, 2002 Chaperone  
534 suppression of alpha-synuclein toxicity in a *Drosophila* model for Parkinson’s disease. *Science*  
535 295: 865–868.
- 536 Bakhom, M. F., C. Y. Bakhom, Z. Ding, S. M. Carlton, G. A. Campbell *et al.*, 2014 Evidence for  
537 autophagic gridlock in aging and neurodegeneration. *Transl. Res.* 164: 1–12.
- 538 Barmada, S. J., G. Skibinski, E. Korb, E. J. Rao, J. Y. Wu *et al.*, 2010 Cytoplasmic mislocalization of  
539 TDP-43 is toxic to neurons and enhanced by a mutation associated with familial amyotrophic  
540 lateral sclerosis. *J. Neurosci.* 30: 639–649.
- 541 Bhardwaj, A., M. P. Myers, E. Buratti, and F. E. Baralle, 2013 Characterizing TDP-43 interaction with  
542 its RNA targets. *Nucleic Acids Res.* 41: 5062–5074.
- 543 Blard, O., S. Feuillette, J. Bou, B. Chaumette, T. Frebourg *et al.*, 2007 Cytoskeleton proteins are  
544 modulators of mutant tau-induced neurodegeneration in *Drosophila*. *Hum. Mol. Genet.* 16: 555–  
545 566.
- 546 Blokhuis, A. M., E. J. N. Groen, M. Koppers, L. H. Van Den Berg, and R. J. Pasterkamp, 2013 Protein  
547 aggregation in amyotrophic lateral sclerosis. *Acta Neuropathol.* 125: 777–794.
- 548 Brady, O. a., P. Meng, Y. Zheng, Y. Mao, and F. Hu, 2011 Regulation of TDP-43 aggregation by  
549 phosphorylation and p62/SQSTM1. *J. Neurochem.* 116: 248–259.
- 550 Brand, A. H., and N. Perrimon, 1993 Targeted gene expression as a means of altering cell fates and  
551 generating dominant phenotypes. *Development* 118: 401–15.
- 552 Vanden Broeck, L., M. Naval-Sánchez, Y. Adachi, D. Diaper, P. Dourlen *et al.*, 2013 TDP-43 loss-of-  
553 function causes neuronal loss due to defective steroid receptor-mediated gene program switching in  
554 *Drosophila*. *Cell Rep.* 3: 160–72.
- 555 Camdessanche, J.-P., V. V Belzil, G. Jousserand, G. A. Rouleau, C. Creac’h *et al.*, 2011 Sensory and  
556 motor neuronopathy in a patient with the A382P TDP-43 mutation. *Orphanet J. Rare Dis.* 6: 4.

- 557 Chang, J. C., and D. B. Morton, 2017 *Drosophila* lines with mutant and wild type human TDP-43  
558 replacing the endogenous gene reveals phosphorylation and ubiquitination in mutant lines in the  
559 absence of viability or lifespan defects. *PLoS One* 12: 1–24.
- 560 Chatterjee, S., T. K. Sang, G. M. Lawless, and G. R. Jackson, 2009 Dissociation of tau toxicity and  
561 phosphorylation: Role of GSK-3 $\beta$ , MARK and Cdk5 in a *Drosophila* model. *Hum. Mol. Genet.* 18:  
562 164–177.
- 563 Chiang, C.-H., C. Grauffel, L.-S. Wu, P.-H. Kuo, L. G. Doudeva *et al.*, 2016 Structural analysis of  
564 disease-related TDP-43 D169G mutation: linking enhanced stability and caspase cleavage  
565 efficiency to protein accumulation. *Sci. Rep.* 6: 21581.
- 566 Choksi, D. K., B. Roy, S. Chatterjee, T. Yusuff, M. F. Bakhoun *et al.*, 2014 TDP-43 phosphorylation by  
567 casein kinase  $\delta$  promotes oligomerization and enhances toxicity in vivo. *Hum. Mol. Genet.* 23:  
568 1025–1035.
- 569 Chouhan, A. K., C. Guo, Y.-C. Hsieh, H. Ye, M. Senturk *et al.*, 2016 Uncoupling neuronal death and  
570 dysfunction in *Drosophila* models of neurodegenerative disease. *Acta Neuropathol. Commun.* 4:  
571 62.
- 572 Chyb, S., W. Hevers, M. Forte, W. J. Wolfgang, Z. Selinger *et al.*, 1999 Modulation of the light  
573 response by cAMP in *Drosophila* photoreceptors. *J. Neurosci.* 19: 8799–8807.
- 574 Couthouis, J., M. P. Hart, J. Shorter, M. DeJesus-Hernandez, R. Erion *et al.*, 2011 A yeast functional  
575 screen predicts new candidate ALS disease genes. *Proc. Natl. Acad. Sci. U. S. A.* 108: 20881–90.
- 576 Dolph, P., A. Nair, and P. Raghu, 2011 Electroretinogram recordings of *Drosophila*. *Cold Spring Harb.*  
577 *Protoc.* 2011: pdb.prot5549.
- 578 Estes, P. S., A. Boehringer, R. Zwick, J. E. Tang, B. Grigsby *et al.*, 2011 Wild-type and A315T mutant  
579 TDP-43 exert differential neurotoxicity in a *Drosophila* model of ALS. *Hum. Mol. Genet.* 20:  
580 2308–2321.
- 581 Fabian-Fine, R., P. Verstreken, P. R. Hiesinger, J. A. Horne, R. Kostyleva *et al.*, 2003 Endophilin  
582 promotes a late step in endocytosis at glial invaginations in *Drosophila* photoreceptor terminals. *J.*  
583 *Neurosci.* 23: 10732–10744.
- 584 Feany, M. B., and W. W. Bender, 2000 A *Drosophila* model of Parkinson’s disease. *Nature* 404: 394–  
585 398.
- 586 Feiguin, F., V. K. Godena, G. Romano, A. D’Ambrogio, R. Klima *et al.*, 2009 Depletion of TDP-43  
587 affects *Drosophila* motoneurons terminal synapsis and locomotive behavior. *FEBS Lett.* 583:  
588 1586–1592.
- 589 Filimonenko, M., S. Stuffers, C. Raiborg, A. Yamamoto, L. Malerød *et al.*, 2007 Functional  
590 multivesicular bodies are required for autophagic clearance of protein aggregates associated with



- 591 neurodegenerative disease. *J. Cell Biol.* 179: 485–500.
- 592 Freeman, M., 1996 Reiterative use of the EGF receptor triggers differentiation of all cell types in the  
593 *Drosophila* eye. *Cell* 87: 651–660.
- 594 Gendron, T. F., and L. Petrucelli, 2011 Rodent models of TDP-43 proteinopathy: investigating the  
595 mechanisms of TDP-43-mediated neurodegeneration. *J. Mol. Neurosci.* 45: 486–99.
- 596 Geser, F., M. Martinez-Lage, L. K. Kwong, V. M. Y. Lee, and J. Q. Trojanowski, 2009 Amyotrophic  
597 lateral sclerosis, frontotemporal dementia and beyond: The TDP-43 diseases. *J. Neurol.* 256: 1205–  
598 1214.
- 599 Gitcho, M. a., E. H. Bigio, M. Mishra, N. Johnson, S. Weintraub *et al.*, 2009 TARDBP 3'-UTR variant  
600 in autopsy-confirmed frontotemporal lobar degeneration with TDP-43 proteinopathy. *Acta*  
601 *Neuropathol.* 118: 633–645.
- 602 Guo, W., Y. Chen, X. Zhou, A. Kar, P. Ray *et al.*, 2011 An ALS-associated mutation affecting TDP-43  
603 enhances protein aggregation, fibril formation and neurotoxicity. *Nat. Struct. Mol. Biol.* 18: 822–  
604 830.
- 605 Hanson, K. A., S. H. Kim, D. A. Wassarman, and R. S. Tibbetts, 2010 Ubiquilin modifies TDP-43  
606 toxicity in a *Drosophila* model of amyotrophic lateral sclerosis (ALS). *J. Biol. Chem.* 285: 11068–  
607 11072.
- 608 Hasegawa, M., T. Arai, H. Akiyama, T. Nonaka, H. Mori *et al.*, 2007 TDP-43 is deposited in the Guam  
609 parkinsonism-dementia complex brains. *Brain* 130: 1386–1394.
- 610 Heads, T., M. Pollock, A. Robertson, W. H. Sutherland, and S. Allpress, 1991 Sensory nerve pathology  
611 in amyotrophic lateral sclerosis. *Acta Neuropathol.* 82: 316–320.
- 612 Igaz, L. M., L. K. Kwong, E. B. Lee, A. Chen-Plotkin, E. Swanson *et al.*, 2011 Dysregulation of the  
613 ALS-associated gene TDP-43 leads to neuronal death and degeneration in mice. *J. Clin. Invest.*  
614 121: 726–738.
- 615 Jackson, G. R., I. Salecker, X. Dong, X. Yao, N. Arnheim *et al.*, 1998 Polyglutamine-expanded human  
616 huntingtin transgenes induce degeneration of *Drosophila* photoreceptor neurons. *Neuron* 21: 633–  
617 642.
- 618 Jackson, G. R., M. Wiedau-Pazos, T.-K. Sang, N. Wagle, C. A. Brown *et al.*, 2002 Human wild-type tau  
619 interacts with wingless pathway components and produces neurofibrillary pathology in *Drosophila*.  
620 *Neuron* 34: 509–519.
- 621 Johnson, B. S., J. M. McCaffery, S. Lindquist, and A. D. Gitler, 2008 A yeast TDP-43 proteinopathy  
622 model: Exploring the molecular determinants of TDP-43 aggregation and cellular toxicity. *Proc.*  
623 *Natl. Acad. Sci. U. S. A.* 105: 6439–6444.

- 624 Johnson, B. S., D. Snead, J. J. Lee, J. M. McCaffery, J. Shorter *et al.*, 2009 TDP-43 is intrinsically  
625 aggregation-prone, and amyotrophic lateral sclerosis-linked mutations accelerate aggregation and  
626 increase toxicity. *J. Biol. Chem.* 284: 20329–20339.
- 627 Langellotti, S., V. Romano, G. Romano, R. Klima, F. Feiguin *et al.*, 2016 A novel *Drosophila* model of  
628 TDP-43 proteinopathies: N-terminal sequences combined with the Q/N domain induce protein  
629 functional loss and locomotion defects. *Dis. Model. Mech.* 9: 659–669.
- 630 Lee, E. B., V. M.-Y. Lee, and J. Q. Trojanowski, 2012 Gains or losses: molecular mechanisms of  
631 TDP43-mediated neurodegeneration. *Nat. Rev. Neurosci.* 13: 38–50.
- 632 Li, Y., P. Ray, E. J. Rao, C. Shi, W. Guo *et al.*, 2010 A *Drosophila* model for TDP-43 proteinopathy.  
633 *Proc. Natl. Acad. Sci. U. S. A.* 107: 3169–3174.
- 634 Li, H.-Y., P.-A. Yeh, H.-C. Chiu, C.-Y. Tang, and B. P. Tu, 2011 Hyperphosphorylation as a defense  
635 mechanism to reduce TDP-43 aggregation. *PLoS One* 6: e23075.
- 636 Liu, Y., W. Duan, Y. Guo, Z. Li, H. Han *et al.*, 2014 A new cellular model of pathological TDP-43: The  
637 neurotoxicity of stably expressed CTF25 of TDP-43 depends on the proteasome. *Neuroscience* 281:  
638 88–98.
- 639 Lu, Y., J. Ferris, and F.-B. Gao, 2009 Frontotemporal dementia and amyotrophic lateral sclerosis-  
640 associated disease protein TDP-43 promotes dendritic branching. *Mol. Brain* 2: 30.
- 641 Mackenzie, I. R. a, and R. Rademakers, 2008 The role of transactive response DNA-binding protein-43  
642 in amyotrophic lateral sclerosis and frontotemporal dementia. *Curr. Opin. Neurol.* 21: 693–700.
- 643 Miguel, L., T. Frébourg, D. Champion, and M. Lecourtois, 2011 Both cytoplasmic and nuclear  
644 accumulations of the protein are neurotoxic in *Drosophila* models of TDP-43 proteinopathies.  
645 *Neurobiol. Dis.* 41: 398–406.
- 646 Mishra, M., T. Paunesku, G. E. Woloschak, T. Siddique, L. Zhu *et al.*, 2007 Gene expression analysis of  
647 frontotemporal lobar degeneration of the motor neuron disease type with ubiquitinated inclusions.  
648 *Acta Neuropathol.* 114: 81–94.
- 649 Mochizuki, Y., T. Mizutani, T. Shimizu, and A. Kawata, 2011 Proportional neuronal loss between the  
650 primary motor and sensory cortex in amyotrophic lateral sclerosis. *Neurosci. Lett.* 503: 73–75.
- 651 Neumann, M., D. M. Sampathu, L. K. Kwong, A. C. Truax, M. C. Micsenyi *et al.*, 2006 Ubiquitinated  
652 TDP-43 in frontotemporal lobar degeneration and amyotrophic lateral sclerosis. *Science* 314: 130–  
653 133.
- 654 Nguyen, H. P., C. Van Broeckhoven, and J. van der Zee, 2018 ALS Genes in the Genomic Era and their  
655 Implications for FTD. *Trends Genet.* 34: 404–423.
- 656 Nonaka, T., F. Kametani, T. Arai, H. Akiyama, and M. Hasegawa, 2009 Truncation and pathogenic

- 657 mutations facilitate the formation of intracellular aggregates of TDP-43. *Hum. Mol. Genet.* 18:  
658 3353–3364.
- 659 Park, J. H., A. J. Schroeder, C. Helfrich-Förster, F. R. Jackson, and J. Ewer, 2003 Targeted ablation of  
660 CCAP neuropeptide-containing neurons of *Drosophila* causes specific defects in execution and  
661 circadian timing of ecdysis behavior. *Development* 130: 2645–2656.
- 662 Polymenidou, M., C. Lagier-Tourenne, K. R. Hutt, S. C. Huelga, J. Moran *et al.*, 2011 Long pre-mRNA  
663 depletion and RNA missplicing contribute to neuronal vulnerability from loss of TDP-43. *Nat.*  
664 *Neurosci.* 14: 459–68.
- 665 Pons, M., L. Miguel, C. Miel, T. Avequin, F. Juge *et al.*, 2017 Splicing factors act as genetic modulators  
666 of TDP-43 production in a new autoregulatory TDP-43 *Drosophila* model. *Hum. Mol. Genet.* 26:  
667 3396–3408.
- 668 Powell, J. R., and E. N. Moriyama, 1997 Evolution of codon usage bias in *Drosophila*. *Proc. Natl. Acad.*  
669 *Sci. U. S. A.* 94: 7784–7790.
- 670 Ratnaparkhi, A., G. M. Lawless, F. E. Schweizer, P. Golshani, and G. R. Jackson, 2008 A *Drosophila*  
671 model of ALS: human ALS-associated mutation in VAP33A suggests a dominant negative  
672 mechanism. *PLoS One* 3: e2334.
- 673 Ritson, G. P., S. K. Custer, B. D. Freibaum, J. B. Guinto, D. Geffel *et al.*, 2010 TDP-43 mediates  
674 degeneration in a novel *Drosophila* model of disease caused by mutations in VCP/p97. *J. Neurosci.*  
675 30: 7729–7739.
- 676 Romano, M., F. Feiguin, and E. Buratti, 2012 *Drosophila* Answers to TDP-43 Proteinopathies. *J. Amino*  
677 *Acids* 2012: 356081.
- 678 Rubinsztein, D. C., 2006 The roles of intracellular protein-degradation pathways in neurodegeneration.  
679 *Nature* 443: 780–786.
- 680 Sang, T. K., and G. R. Jackson, 2005 *Drosophila* models of neurodegenerative disease. *NeuroRx* 2: 438–  
681 446.
- 682 Sasaki, S., 2011 Autophagy in spinal cord motor neurons in sporadic amyotrophic lateral sclerosis. *J.*  
683 *Neuropathol. Exp. Neurol.* 70: 349–59.
- 684 Schneider, C. A., W. S. Rasband, and K. W. Eliceiri, 2012 NIH Image to ImageJ: 25 years of image  
685 analysis. *Nat. Methods* 9: 671–675.
- 686 Shan, X., D. Voadlo, and C. Krieger, 2009 Mislocalization of TDP-43 in the G93A mutant SOD1  
687 transgenic mouse model of ALS. *Neurosci. Lett.* 458: 70–74.
- 688 Shulman, J. M., and M. B. Feany, 2003 Genetic Modifiers of Tauopathy in *Drosophila*. *Genetics* 165:  
689 1233–1242.

- 690 Shulman, J. M., S. Imboywa, N. Giagtzoglou, M. P. Powers, Y. Hu *et al.*, 2014 Functional screening in  
691 *Drosophila* identifies Alzheimer's disease susceptibility genes and implicates tau-mediated  
692 mechanisms. *Hum. Mol. Genet.* 23: 870–877.
- 693 Stallings, N. R., K. Puttappathi, C. M. Luther, D. K. Burns, and J. L. Elliott, 2010 Progressive motor  
694 weakness in transgenic mice expressing human TDP-43. *Neurobiol. Dis.* 40: 404–414.
- 695 Tang, C.-Y., and Y. H. Sun, 2002 Use of mini-white as a reporter gene to screen for GAL4 insertions  
696 with spatially restricted expression pattern in the developing eye in *drosophila*. *Genesis* 34: 39–45.
- 697 Tanji, K., H. X. Zhang, F. Mori, A. Kakita, H. Takahashi *et al.*, 2012 P62/sequestosome 1 binds to TDP-  
698 43 in brains with frontotemporal lobar degeneration with TDP-43 inclusions. *J. Neurosci. Res.* 90:  
699 2034–2042.
- 700 Therrien, M., a M. Wong, E. Kwan, and G. M. Rubin, 1999 Functional analysis of CNK in RAS  
701 signaling. *Proc. Natl. Acad. Sci. U. S. A.* 96: 13259–63.
- 702 Tollervey, J. R., T. Curk, B. Rogelj, M. Briese, M. Cereda *et al.*, 2011 Characterizing the RNA targets  
703 and position-dependent splicing regulation by TDP-43. *Nat. Neurosci.* 14: 452–8.
- 704 Tsai, K.-J., C.-H. Yang, Y.-H. Fang, K.-H. Cho, W.-L. Chien *et al.*, 2010 Elevated expression of TDP-  
705 43 in the forebrain of mice is sufficient to cause neurological and pathological phenotypes  
706 mimicking FTL-D. *J. Exp. Med.* 207: 1661–1673.
- 707 Tsuda, H., H. Jafar-Nejad, A. J. Patel, Y. Sun, H.-K. Chen *et al.*, 2005 The AXH domain of Ataxin-1  
708 mediates neurodegeneration through its interaction with Gfi-1/Senseless proteins. *Cell* 122: 633–  
709 644.
- 710 Vaccaro, A., A. Tauffenberger, D. Aggad, G. Rouleau, P. Drapeau *et al.*, 2012 Mutant TDP-43 and FUS  
711 cause age-dependent paralysis and neurodegeneration in *C. elegans*. *PLoS One* 7: e31321.
- 712 Vaughan, S. K., N. M. Sutherland, S. Zhang, T. Hatzipetros, F. Vieira *et al.*, 2018 The ALS-inducing  
713 factors, TDP43(A315T) and SOD1(G93A), directly affect and sensitize sensory neurons to stress.  
714 *Sci. Rep.* 8: 16582.
- 715 Voigt, A., D. Herholz, F. C. Fiesel, K. Kaur, D. Muller *et al.*, 2010 TDP-43-mediated neuron loss in  
716 vivo requires RNA-binding activity. *PLoS One* 5: e12247.
- 717 Wegorzewska, I., S. Bell, N. J. Cairns, T. M. Miller, and R. H. Baloh, 2009 TDP-43 mutant transgenic  
718 mice develop features of ALS and frontotemporal lobar degeneration. *Proc. Natl. Acad. Sci. U. S.*  
719 *A.* 106: 18809–18814.
- 720 Welch, M., S. Govindarajan, J. E. Ness, A. Villalobos, A. Gurney *et al.*, 2009 Design parameters to  
721 control synthetic gene expression in *Escherichia coli*. *PLoS One* 4: e7002.
- 722 Williamson, W. R., D. Wang, A. S. Haberman, and P. R. Hiesinger, 2010 A dual function of V0-ATPase

- 723 a1 provides an endolysosomal degradation mechanism in *Drosophila melanogaster* photoreceptors.  
724 J. Cell Biol. 189: 885–99.
- 725 Wong, E., and A. M. Cuervo, 2010 Autophagy gone awry in neurodegenerative diseases. Nat. Neurosci.  
726 13: 805–811.
- 727 Zhang, X., S. Chen, K. Huang, and W. Le, 2013 Why should autophagic flux be assessed? Nat. Publ.  
728 Gr. 34: 595–599.

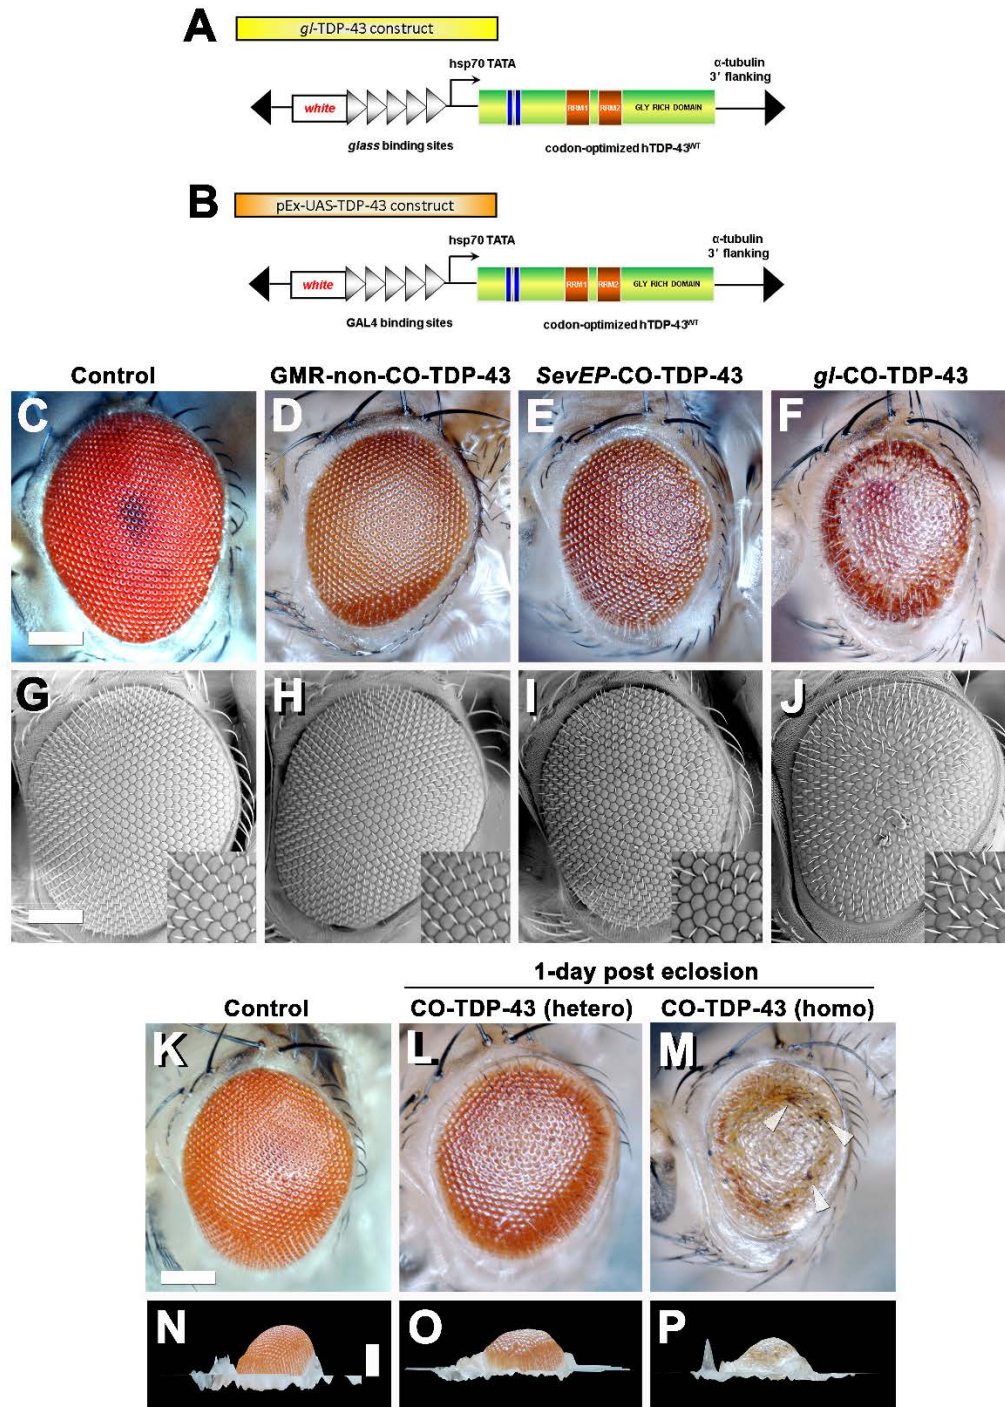

**Figure 1. Misexpression of codon optimized TDP-43 induces depigmentation and irregularities in bristles compared to existing human wild-type TDP-43 lines.** Transgenic flies stably express wild-type or codon optimized TDP-43 using eye promoters. All stocks were kept and maintained at room temperature (22°C). (A-B) Schematic of the codon optimized TDP-

43 constructs using *glass* direct fusion promoter vector and UAS vector used to create the transgenic codon optimized TDP-43 lines. **(C-J)** Photomicrograph and scanning electron microscopy (SEM) images of the adult retina at 10 days post-eclosion (scale bar 50  $\mu$ M). Compared to existing human wild-type TDP-43 transgenic flies expressed using GMR-GAL4 promoter **(D and H)**, the codon optimized wild-type TDP-43 flies using *glass* direct fusion promoter **(F and J)** exhibit a robust eye phenotype including depigmentation, disruption in planar polarity and loss of bristles. *SevEP*-GAL4, a selective R7 and R8 photoreceptor neuron driver, recombined with codon optimized wild-type TDP-43 **(E and I)** also shows the same phenotypes. **(C and G)** are controls. **(K-P)** The robust phenotype mediated by codon optimized TDP-43 is both age and dosage dependent. At 1 day post-eclosion, codon optimized TDP-43 **(L)** shows less depigmentation compared to 10 days post-eclosion **(E)**. A homozygous codon optimized TDP-43 expression **(M)** shows a dramatically more robust phenotype with some necrosis (white arrowheads) at 1 day post-eclosion. Compared to control flies **(K and N)**, both hetero- and homozygous codon optimized TDP-43 shows decreased volume **(O and P respectively)**. Scale bar: 100 nm. Genotypes: **(C and G)** Canton S, **(D and H)**  $w^{1118}/+;GMR-GAL4/+;UAS-hTDP-43^{WT}/+$ , **(E and I)**  $w^{1118}/+;SevEP-GAL4,UAS-TDP-43^{CO}/+;+$ , **(F and J)**  $w^{1118}/+;gl-TDP-43^{CO}/+;+$ , **(K and N)** Canton S, **(L and O)**  $w^{1118}/+;gl-TDP-43^{CO}/+;+$ , **(M and P)**  $w^{1118};gl-TDP-43^{CO}/+;+$ .

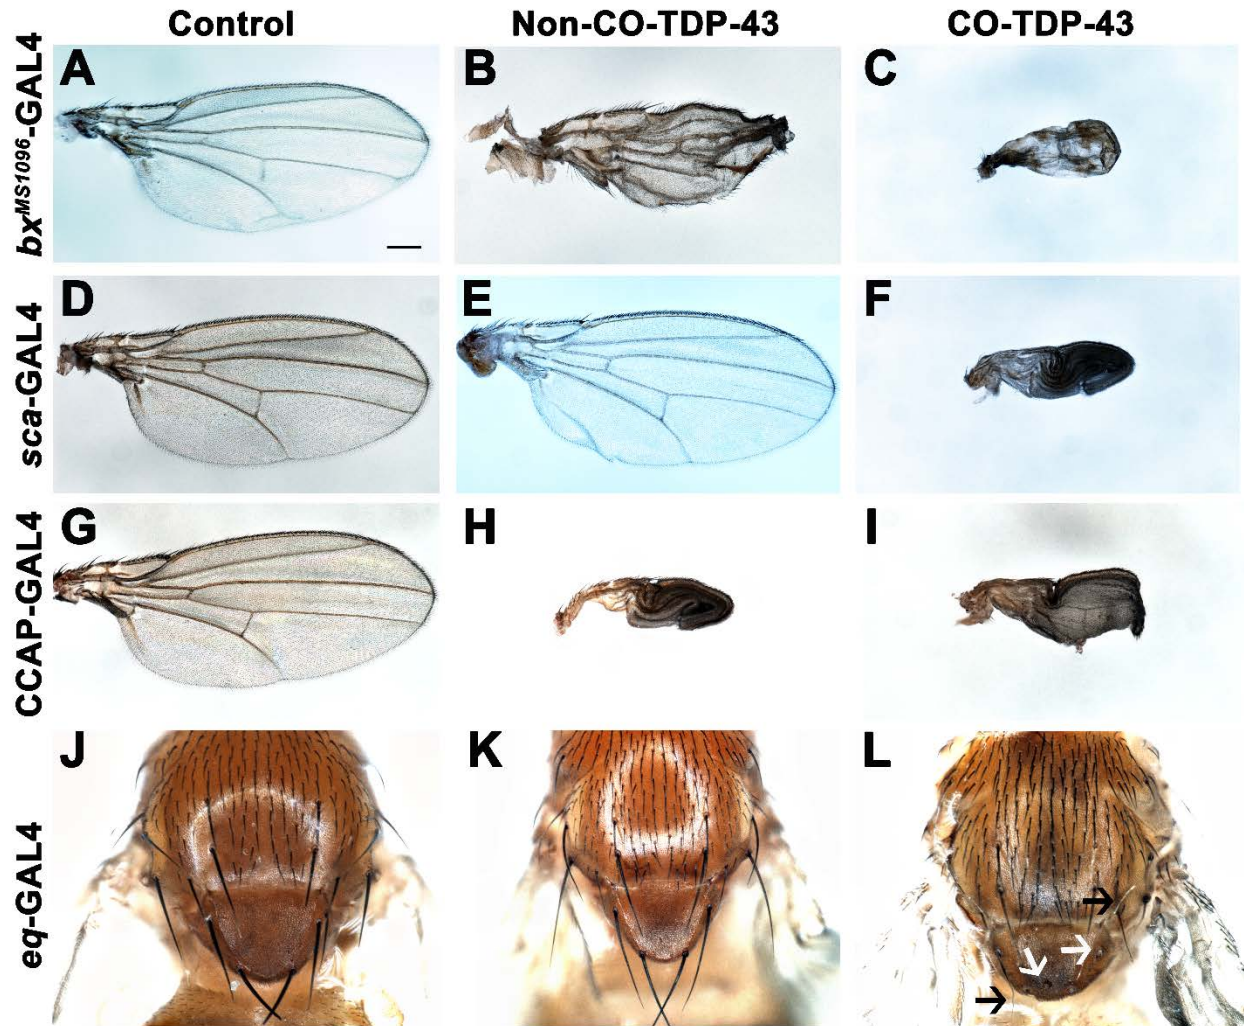

**Figure 2. Misexpression of codon optimized TDP-43 leads to wing expansion and swelling defects as well as singed and loss of bristles in the fly notum.** (A-C) Codon optimized TDP-43 expressed in the wings using the wing-specific driver *bx<sup>MS1096</sup>-GAL4* leads to pharate adults with smaller, swollen and necrotic wings (C), as compared to healthy, viable adults expressing human wild-type TDP-43 with crumpled wings (B) and normal wings with the driver alone (A). (D-F) Using *sca-GAL4* driver, human wild-type TDP-43 flies (E) have normal wings, similar to controls with the driver alone (D), while codon optimized TDP-43 causes pharate adults with smaller, necrotic wings with expansion defect (F). (G-I) CCAP-GAL4, expressed in



CCAP/bursicon neurons in the ventral nerve cord and the subesophageal ganglion in the adult brain, driven expression of codon optimized TDP-43 **(I)** as well as human wild-type TDP-43 **(H)** also exhibit similar wing expansion defects, compared to the driver alone **(G)**. **(J-L)** A bristle specific driver, *eq-GAL4*, causes a dramatic loss of bristles (white arrows) and singed bristles (black arrows) with codon optimized TDP-43 flies **(L)**, while human wild-type TDP-43 **(K)** and driver alone **(J)** develop normal bristles. Scale bar: 200um. Genotypes: **(A)**  $w^{1118}, bx^{MS1096}-GAL4/+;+;+$ , **(B)**  $w^{1118}, bx^{MS1096}-GAL4/+;+;UAS-hTDP-43^{WT}/+$ , **(C)**  $w^{1118}, bx^{MS1096}-GAL4/+;+;UAS-TDP-43^{CO}/+$ , **(D)**  $w^{1118}/+;sca-GAL4/+;+$ , **(E)**  $w^{1118}/+;sca-GAL4/+;UAS-hTDP-43^{WT}/+$ , **(F)**  $w^{1118}/+;sca-GAL4/+;UAS-TDP-43^{CO}/+$ , **(G)**  $y^1, w^*/+;CCAP-GAL4/+;+$ , **(H)**  $y^1, w^*/+;CCAP-GAL4/+;UAS-hTDP-43^{WT}/+$ , **(I)**  $y^1, w^*/+;CCAP-GAL4/+;UAS-TDP-43^{CO}/+$ , **(J)**  $w^{1118}/+; eq-GAL4/+;+;+$ , **(K)**  $w^{1118}/+; eq-GAL4/+;+;UAS-hTDP-43^{WT}/+$ , **(L)**  $w^{1118}/+; eq-GAL4/+;+; UAS-TDP-43^{CO}/+$ .

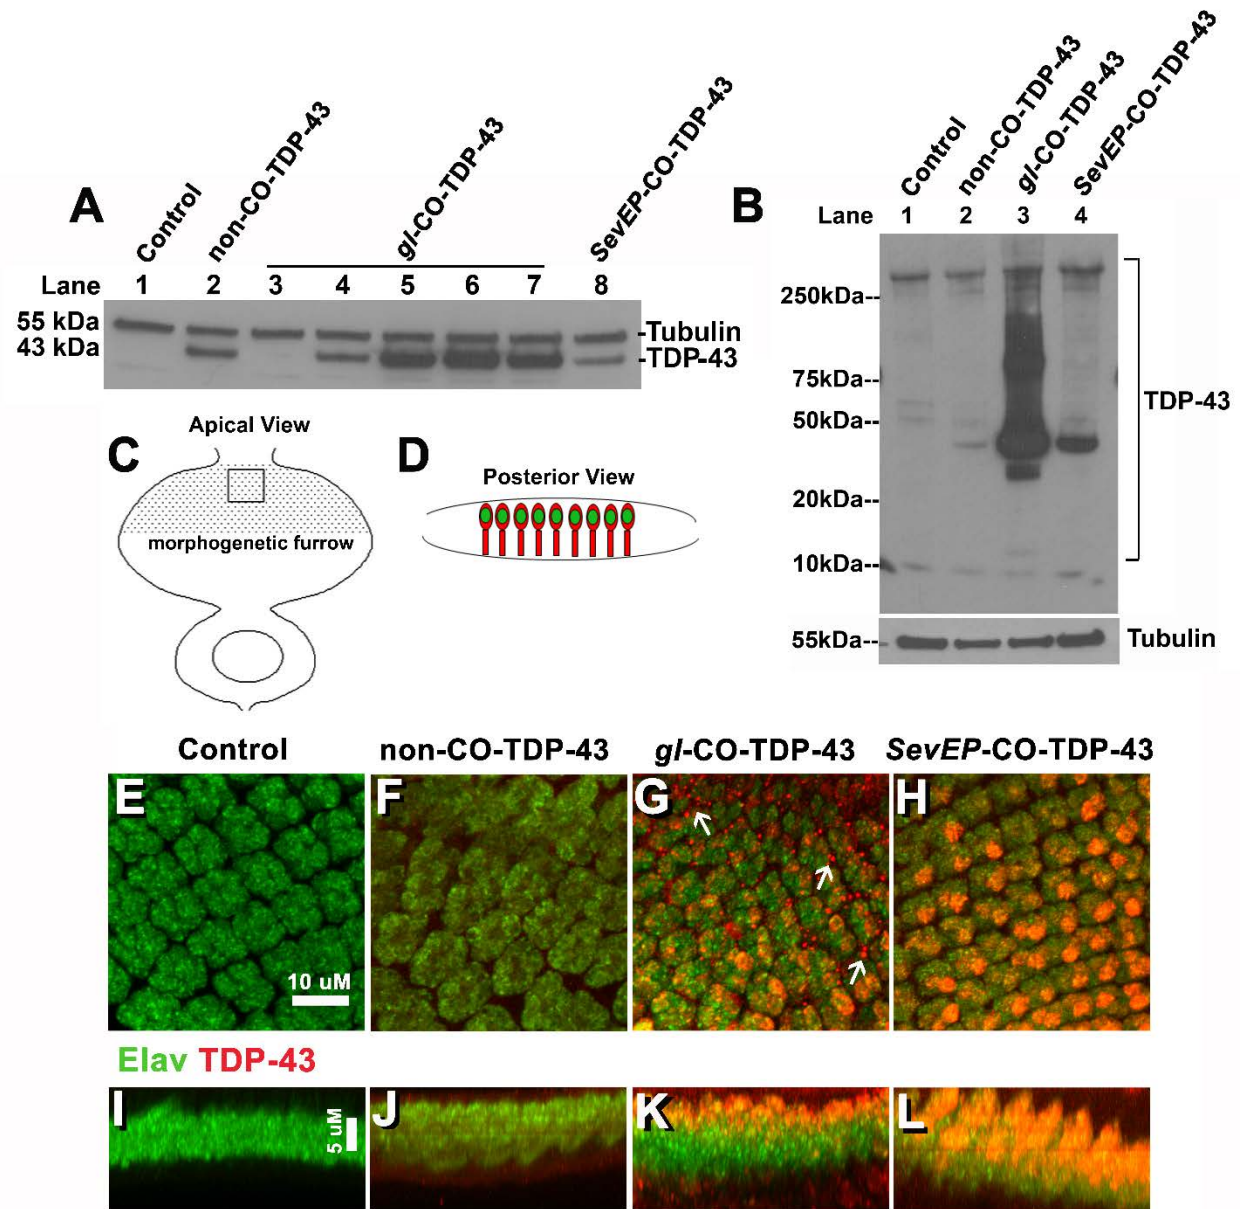

**Figure 3. Codon optimized TDP-43 transgenic fly expresses higher protein levels, causing robust mislocalization to the cytoplasm and aggregate formation in larval eye discs. (A)** Western blot analysis comparing the total TDP-43 levels in eyes from human wild-type TDP-43 flies (lane 2) to the different generated codon optimized TDP-43 lines (lane 3-8) and control flies (lane 1). Among the different codon optimized TDP-43 lines, *gl*-TDP-43<sup>CO3</sup>, *gl*-TDP-43<sup>CO4</sup> and *gl*-TDP-43<sup>CO5</sup> (lane 5, 6 and 7 respectively) have the highest expression of TDP-43, almost a 2-

fold increase compared to human wild-type TDP-43. Codon optimized TDP-43 expression driven with a selective R7 and R8 photoreceptor neuron driver, SevEP-GAL4, did not show increased expression of the total protein (lane 8).  $\beta$ -tubulin is presented as a loading control. **(B)** Codon optimized TDP-43 (*gl*-TDP-43<sup>CO3</sup>, lane 3) exhibits higher molecular weight species of TDP-43 as well as the known 15kD truncated c-terminal fragment compared to human wild-type TDP-43 (lane 2) or the SevEP-GAL4 driven codon optimized TDP-43 (lane 4). Lane 1 is wild-type control.  $\beta$ -tubulin is presented as a loading control. **(C and D)** Schematic of the third instar larval imaginal eye-antennal disc from an apical and posterior view, respectively. The area represented with the rectangular box in **(C)** is the area imaged. **(E-L)** Confocal images of the third instar imaginal eye discs stained with neuronal marker Elav (green) and TDP-43 (red). There is a greater expression of both nuclear and cytoplasmic TDP-43 in codon optimized lines **(G and H)** as compared to human wild-type TDP-43 **(F)**. The *gl*-TDP-43<sup>CO3</sup> flies exhibit a more robust mislocalization and aggregation of cytoplasmic TDP-43; white arrows in **(G)**. **(E)** shows the control (scale bar 10  $\mu$ m). **(I-L)** represents the posterior view of the eye discs to show nuclear and cytoplasmic TDP-43 expression (scale bar 5  $\mu$ m). Genotypes: **(A)**  $w^{1118};+;+$ ,  $w^{1118};GMR-GAL4/+;UAS-hTDP-43^{WT}/+$ ,  $w^{1118};gl-TDP-43^{CO1}/+;+$ ,  $w^{1118};+;gl-TDP-43^{CO2}/+$ ,  $w^{1118};gl-TDP-43^{CO3}/+;+$ ,  $w^{1118};gl-TDP-43^{CO4}/+;+$ ,  $w^{1118};gl-TDP-43^{CO5}/+;+$ ,  $w^{1118};SevEP-GAL4,UAS-TDP-43^{CO}/+;+$  (lane 1-8, respectively). **(B)**  $w^{1118};+;+$ ,  $w^{1118};GMR-GAL4/+;UAS-hTDP-43^{WT}/+$ ,  $w^{1118};gl-TDP-43^{CO}/+;+$ ,  $w^{1118};SevEP-GAL4,UAS-TDP-43^{CO}/+;+$  (lane 1-4, respectively). **(E and I)** Canton S, **(F and J)**  $w^{1118};GMR-GAL4/+;UAS-hTDP-43^{WT}/+$ , **(G and K)**  $w^{1118};gl-TDP-43^{CO}/+;+$ , **(H and L)**  $w^{1118};SevEP-GAL4,UAS-TDP-43^{CO}/+;+$ .

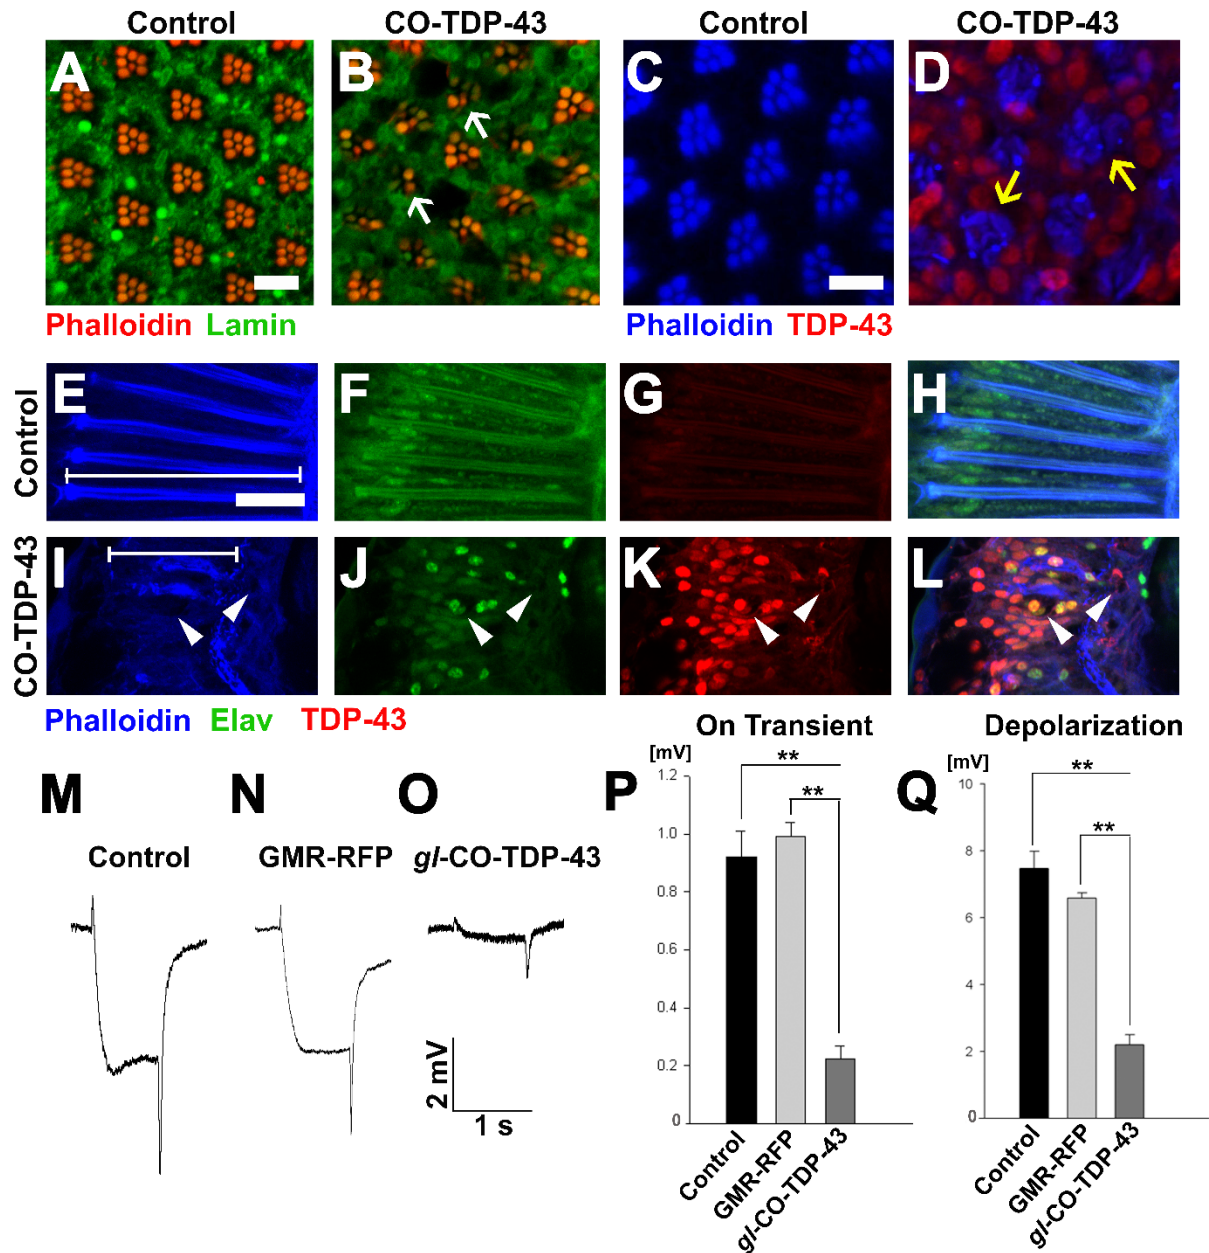

**Figure 4. TDP-43 misexpression in adult retina causes degeneration and altered morphology of the photoreceptor neurons.** (A) UAS-LacZ and (B) UAS-TDP-43<sup>CO</sup> expressed in the retina using *Rhl*-GAL4 that selectively expresses TDP-43 in R1-R6 photoreceptor neurons during the late pupal stage. Compared to control, the codon optimized TDP-43 shows loss of rhabdomeres (white arrows) and degeneration in the 7 days post-eclosion adult retina (scale bar 5

$\mu\text{m}$ ). The *gl*-TDP-43<sup>CO3</sup> flies (**D**) exhibit rhabdomere separation defect and flattened structures of the rhabdomeres (yellow arrows) in 1 day post-eclosion adult compared to GMR-GAL4 control (**C**), as seen in the tangential view of the retina (scale bar 5  $\mu\text{m}$ ). Similarly, in the longitudinal view, the *gl*-TDP-43<sup>CO3</sup> flies (**I-L**) show altered photoreceptor morphology that appear to be shorter (white lines in **E** and **I**) compared to control (**E-H**). The codon optimized TDP-43 flies also contain large vacuoles (white arrowheads) in 1 day post-eclosion adult retina (scale bar 10  $\mu\text{m}$ ). (**M-O**) ERG traces of wild-type control, GMR-RFP control and *gl*-TDP-43<sup>CO3</sup> 1 day post-eclosion adults, respectively, are shown. Quantification of the ERG response amplitude for on transient (**P**) and depolarization (**Q**), along with the traces, show that codon optimized TDP-43 flies have decreased responses for both measures. For on transient effect,  $n=15$  and  $p < 0.001$  between both groups (**P**), and for depolarization effect,  $n=15$  and  $p < 0.001$  between both groups (**Q**). Genotypes: (**A**)  $w^{1118}/+;Rh1-GAL4/+;UAS-LacZ/+$ , (**B**)  $w^{1118}/+;Rh1-GAL4/UAS-TDP-43^{CO}/+;$ , (**C**) Canton S, (**D**)  $w^{1118};gl-TDP-43^{CO}/+;+$ , (**E-H**) Canton S, (**I-L**)  $w^{1118};gl-TDP-43^{CO}/+;+$ , (**M**) Canton S, (**N**)  $w^{1118};GMR-GAL4/+;UAS-RFP/+$ , (**O**)  $w^{1118};gl-TDP-43^{CO}/+;+$ .

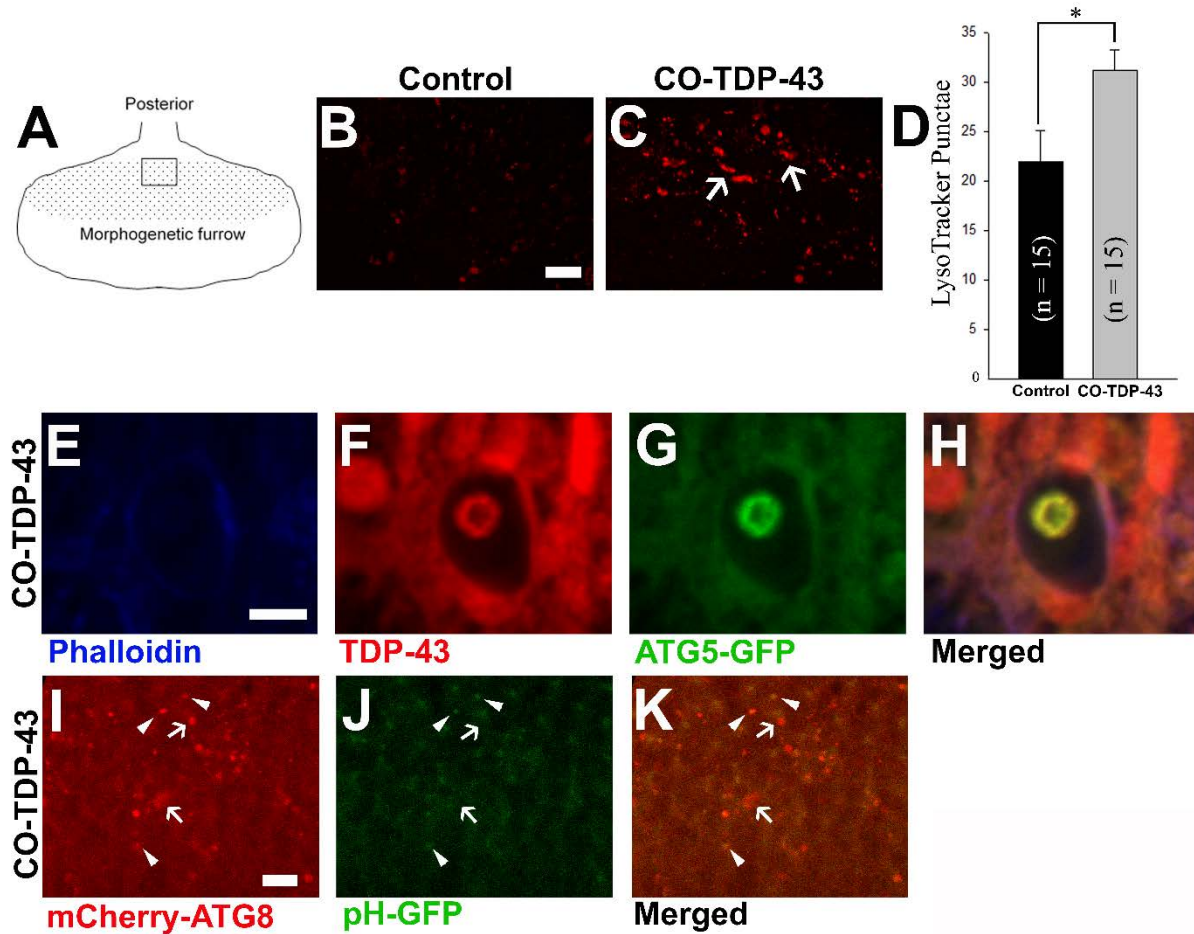

**Figure 5. TDP-43 misexpression leads to increased lysosomal vacuoles positive for autophagy markers.** (A) Schematic of the third instar larvae and the area imaged. Live staining of the LysoTracker dye shows increases in lysosomal punctae in *gl-TDP-43<sup>CO3</sup>* flies (C) compared to control (B). Scale bar equals 10  $\mu$ m. (D) shows quantification of (B and C), n=15 and p=0.02. (E-H) Coexpression of *gl-TDP-43<sup>CO3</sup>* and the autophagic protein Atg5-GFP shows that the large vacuoles present in the 1 day post-eclosion adult retina are positive for Atg5 (scale bar 5  $\mu$ m). (I-K) Another autophagic marker was coexpressed with *gl-TDP-43<sup>CO3</sup>*, Atg8-mCherry-GFP, which is pH sensitive and only expresses GFP at a higher pH content. The TDP-43 expressed flies show that few of the relatively smaller punctae were positive for both Atg8-mCherry and GFP (arrowheads), while a majority of the larger punctae were only fluorescent for

Atg8-mCherry (white arrows), indicating more acidic punctae (scale bar 10  $\mu$ m). Genotypes: **(B)** Canton S, **(C)**  $w^{1118}/+;gl-TDP-43^{CO}/+;+$ , **(E-H)**  $w^{1118}$ , GMR-GAL4/  $w^{1118};gl-TDP-43^{CO}/+;UAS-$  Atg5-GFP/+, **(I-K)**  $w^{1118}$ , GMR-GAL4/  $w^{1118};gl-TDP-43^{CO}/UAS-Atg8-mCherry-GFP;+$ .

| <b>Gain-of-function Drosophila models for TDP-43</b> |                               |                       |                          |                             |                             |                           |                            |                        |                           |                              |                                       |
|------------------------------------------------------|-------------------------------|-----------------------|--------------------------|-----------------------------|-----------------------------|---------------------------|----------------------------|------------------------|---------------------------|------------------------------|---------------------------------------|
|                                                      | <i>CO-TDP-43 (this paper)</i> | <i>Lu et al. 2009</i> | <i>Voigt et al. 2010</i> | <i>Hanson et al. 2010</i>   | <i>Li et al. 2010</i>       | <i>Ritson et al. 2010</i> | <i>Estes et al. 2011</i>   | <i>Guo et al. 2011</i> | <i>Miguel et al. 2011</i> | <i>Chang and Morton 2017</i> | <i>Pons et al. 2017</i>               |
| Transgenic model                                     | human CO-TDP-43               | human wt TDP-43       | Synthetic wt TDP-43      | human wt TDP-43             | human wt TDP-43             | human wt TDP-43           | human wt TDP-43            | human wt TDP-43        | human wt TDP-43           | human wt TDP-43              | human wt TDP-43 with TBPBR expression |
| Eye phenotype                                        | +                             | -                     | -                        | + (age dependent phenotype) | + (age dependent phenotype) | -                         | + (at increased temp 29°C) | -                      | +                         | -                            | +                                     |
| Sensory tissue phenotype                             | +                             | +                     | -                        | -                           | -                           | -                         | -                          | -                      | -                         | -                            | -                                     |
| Cytoplasmic mislocalization                          | +                             | -                     | -                        | -                           | +                           | -                         | +                          | -                      | +                         | -                            | -                                     |
| High-molecular weight/oligomeric species             | +                             | -                     | -                        | -                           | -                           | -                         | -                          | -                      | -                         | -                            | -                                     |
| Cellular aggregation                                 | +                             | -                     | -                        | -                           | +                           | -                         | +                          | -                      | -                         | -                            | -                                     |
| Autophagic upregulation                              | +                             | -                     | -                        | -                           | -                           | -                         | -                          | -                      | -                         | -                            | -                                     |

**Table 1. Gain-of-function Drosophila models for TDP-43.** A comparison of human wild-type TDP-43 transgenic gain-of-function models and codon-optimized TDP-43 models for disease-specific findings.
